# Supplementary material for: Risk of Early Intubation and High-Flow Nasal Cannula Failure in Pneumonia: Pre-Treatment Predictors using Triage Data from a Retrospective COVID-19 Cohort
Source: Research Square preprint supplement (doi:10.21203/rs.3.rs-8427896/v1), 2026-01-25
Supplement: Supplementary file 1 [file 12492cd16e10a98bd2b17840.docx]

**Supplementary material**

**Supplementary Methods**

Patient Enrollment

Upon arrival, individuals were promptly assessed in a dedicated triage area for an initial evaluation, focused on vital signs and key clinical parameters, allowing for rapid priority level categorization. Patients with mild symptoms and stable vital signs were assigned Priority 3 and considered appropriate for outpatient management. Those with clinical findings suggestive of potential deterioration or requiring further diagnostic workup were designated as Priority 2. Patients exhibiting signs of acute respiratory compromise or hemodynamic instability were classified as Priority 1 and immediately transferred to a high-dependency area within the ED (observation unit), equipped for advanced monitoring and the initiation of IMV if necessary.

Some patients in Priority 1 and all those in Priority 2 received immediate blood gas analysis, supplemental oxygen, and rapid-acting bronchodilator therapy as clinically indicated. Concurrently, relevant clinical data and initial laboratory samples were obtained to guide further decisions. Based on the integration of these clinical and paraclinical findings, the appropriate modality of oxygen support was determined prior to or shortly after admission to the observation unit.

Criteria for Intubation

Patients were intubated if they met at least one of the following criteria: severe hypoxemia not amenable to correction with COT or HFNC (e.g., oxygen saturation (SpO₂) <85% despite maximal supplemental oxygen), hemodynamic instability requiring vasopressor support, impaired level of consciousness (Glasgow Coma Scale ≤ 8), signs of imminent respiratory arrest (e.g., gasping, exhaustion), other conditions in which delaying definitive airway protection was considered unsafe by the attending physician.

**Supplementary Results**

Statistical power assessment

Given that no sample size calculation was performed, we conducted an exploratory post hoc power assessment. At a two-sided α of 0.05 and 80% power, comparing early IMV against the combined HFNC cohort, the study was powered to detect Cohen’s h ≈ 0.24 for binary predictors and Cohen’s d ≈ 0.52 for continuous variables. For HFNC success vs. HFNC failure the minimum detectable effect sizes were Cohen’s h ≈0.29 for binary predictors (≈26–28% absolute difference in proportions) and Cohen’s d ≈0.61 for continuous predictors.

**Supplementary Tables**

| Table S1. Participant Characteristics | | | | | | | | | | |
| --- | --- | --- | --- | --- | --- | --- | --- | --- | --- | --- |
| Characteristics | | **Overall,**  **N = 139** | | **Group** | | | | | | **p-value*1*** |
| **HFNC,**  **N = 64** | | **HFNC failure,**  **N = 32** | | **Early IMV,**  **N = 43** | |
| Antropometrics | |  | |  | |  | |  | |  |
| BMI, kg/m2 | | 29.4 (25.9, 33.5) | | 28.9 (25.3, 33.5) | | 29.7 (27.5, 34.0) | | 29.4 (26.5, 32.0) | | 0.9 |
| Overweight | | 48 (35%) | | 17 (27%) | | 12 (38%) | | 19 (44%) | | 0.2 |
| Obesity | | 62 (45%) | | 30 (47%) | | 14 (44%) | | 18 (42%) | | 0.9 |
| Grade III | | 9 (6.5%) | | 5 (7.8%) | | 1 (3.1%) | | 3 (7.0%) | | >0.9 |
| Grade II | | 20 (14%) | | 9 (14%) | | 6 (19%) | | 5 (12%) | |  |
| Grade I | | 33 (24%) | | 16 (25%) | | 7 (22%) | | 10 (23%) | |  |
| Non-obese | | 77 (55%) | | 34 (53%) | | 18 (56%) | | 25 (58%) | |  |
| Manifestations | |  | |  | |  | |  | |  |
| Onset to admission, days | | 8.0 (6.0, 11.0) | | 9.0 (7.0, 11.3) | | 7.0 (5.0, 8.3) | | 8.0 (7.0, 13.5) | | 0.010 |
| Malaise | | 46 (33%) | | 21 (33%) | | 10 (31%) | | 15 (35%) | | >0.9 |
| Chills | | 7 (5.0%) | | 5 (7.8%) | | 2 (6.3%) | | 0 (0%) | | 0.2 |
| Anosmia | | 5 (3.6%) | | 4 (6.3%) | | 0 (0%) | | 1 (2.3%) | | 0.4 |
| Disgeusia | | 4 (2.9%) | | 3 (4.7%) | | 1 (3.1%) | | 0 (0%) | | 0.4 |
| Anorexy | | 8 (5.8%) | | 5 (7.8%) | | 2 (6.3%) | | 1 (2.3%) | | 0.5 |
| Fever | | 89 (64%) | | 37 (58%) | | 24 (75%) | | 28 (65%) | | 0.3 |
| Dyspnea | | 100 (72%) | | 47 (73%) | | 21 (66%) | | 32 (74%) | | 0.7 |
| Asthenia | | 15 (11%) | | 7 (11%) | | 3 (9.4%) | | 5 (12%) | | >0.9 |
| Adynamia | | 18 (13%) | | 10 (16%) | | 3 (9.4%) | | 5 (12%) | | 0.8 |
| Myalgias | | 58 (42%) | | 29 (45%) | | 8 (25%) | | 21 (49%) | | 0.086 |
| Arthralgias | | 49 (35%) | | 22 (34%) | | 8 (25%) | | 19 (44%) | | 0.2 |
| Thoracic pain | | 16 (12%) | | 8 (13%) | | 4 (13%) | | 4 (9.3%) | | 0.9 |
| Odinophagia | | 41 (29%) | | 21 (33%) | | 10 (31%) | | 10 (23%) | | 0.6 |
| Headache | | 50 (36%) | | 22 (34%) | | 9 (28%) | | 19 (44%) | | 0.3 |
| Confusion | | 9 (6.5%) | | 4 (6.3%) | | 3 (9.4%) | | 2 (4.7%) | | 0.7 |
| Nasal congestion | | 2 (1.4%) | | 0 (0%) | | 0 (0%) | | 2 (4.7%) | | 0.15 |
| Rinorrhea | | 20 (14%) | | 6 (9.4%) | | 5 (16%) | | 9 (21%) | | 0.3 |
| Cough | | 23 (17%) | | 11 (17%) | | 6 (19%) | | 6 (14%) | | 0.8 |
| Dry cough | | 67 (48%) | | 31 (48%) | | 18 (56%) | | 18 (42%) | | 0.5 |
| Sputum | | 9 (6.5%) | | 2 (3.1%) | | 2 (6.3%) | | 5 (12%) | | 0.2 |
| Hemoptysis | | 5 (3.6%) | | 3 (4.7%) | | 1 (3.1%) | | 1 (2.3%) | | 0.9 |
| Diarrhea | | 15 (11%) | | 6 (9.4%) | | 7 (22%) | | 2 (4.8%) | | 0.069 |
| Nausea | | 9 (6.5%) | | 6 (9.4%) | | 1 (3.1%) | | 2 (4.7%) | | 0.5 |
| Vomit | | 7 (5.0%) | | 4 (6.3%) | | 3 (9.4%) | | 0 (0%) | | 0.12 |
| Fatigue | | 7 (5.0%) | | 3 (4.7%) | | 3 (9.4%) | | 1 (2.3%) | | 0.4 |
| Night sweats | | 6 (4.3%) | | 3 (4.7%) | | 2 (6.3%) | | 1 (2.3%) | | 0.8 |
| Commorbidities | |  | |  | |  | |  | |  |
| Asthma | | 6 (4.3%) | | 2 (3.1%) | | 3 (9.4%) | | 1 (2.3%) | | 0.4 |
| COPD | | 7 (5.0%) | | 4 (6.3%) | | 3 (9.4%) | | 0 (0%) | | 0.12 |
| ILD | | 12 (8.6%) | | 8 (13%) | | 4 (13%) | | 0 (0%) | | 0.027 |
| OSA | | 9 (6.5%) | | 4 (6.3%) | | 3 (9.4%) | | 2 (4.7%) | | 0.7 |
| Bronchiectasis | | 2 (1.4%) | | 1 (1.6%) | | 0 (0%) | | 1 (2.3%) | | >0.9 |
| TB | | 2 (1.4%) | | 2 (3.1%) | | 0 (0%) | | 0 (0%) | | 0.5 |
| Smoking | | 37 (27%) | | 24 (38%) | | 7 (22%) | | 6 (14%) | | 0.020 |
| TI | | 4.6 (1.0, 14.7) | | 5.8 (1.8, 16.3) | | 5.9 (1.6, 17.4) | | 4.3 (0.4, 4.6) | | 0.7 |
| Biomass exposure | | 14 (10%) | | 5 (7.8%) | | 6 (19%) | | 3 (7.0%) | | 0.2 |
| Alcoholism | | 47 (34%) | | 21 (33%) | | 8 (25%) | | 18 (42%) | | 0.3 |
| Diabetes | | 41 (29%) | | 17 (27%) | | 14 (44%) | | 10 (23%) | | 0.12 |
| Hypertension | | 42 (30%) | | 26 (41%) | | 11 (34%) | | 5 (12%) | | 0.005 |
| CKD | | 6 (4.3%) | | 2 (3.1%) | | 2 (6.3%) | | 2 (4.7%) | | 0.9 |
| Heart failure | | 7 (5.0%) | | 2 (3.1%) | | 2 (6.3%) | | 3 (7.0%) | | 0.6 |
| Neurological sequela | | 2 (1.4%) | | 1 (1.6%) | | 1 (3.1%) | | 0 (0%) | | 0.7 |
| Autoimmunity | | 4 (2.9%) | | 2 (3.1%) | | 2 (6.3%) | | 0 (0%) | | 0.3 |
| Imaging findings | |  | |  | |  | |  | |  | |
| CT scan | | 139 (100%) | | 64 (100%) | | 32 (100%) | | 43 (100%) | |  | |
| Bilateral involvement | | 134 (96%) | | 63 (98%) | | 30 (94%) | | 41 (95%) | | 0.5 | |
| Ground-glass opacities | | 128 (92%) | | 58 (91%) | | 31 (97%) | | 39 (91%) | | 0.6 | |
| Atelectasis | | 2 (1.4%) | | 1 (1.6%) | | 1 (3.1%) | | 0 (0%) | | 0.7 | |
| Consolidation | | 64 (46%) | | 30 (47%) | | 12 (38%) | | 22 (51%) | | 0.5 | |
| Pleural effusion | | 1 (0.7%) | | 0 (0%) | | 0 (0%) | | 1 (2.3%) | | 0.5 | |
| Crazy paving | | 23 (17%) | | 10 (16%) | | 4 (13%) | | 9 (21%) | | 0.6 | |
| Reticulation | | 8 (5.8%) | | 6 (9.4%) | | 1 (3.1%) | | 1 (2.3%) | | 0.3 | |
| Bronchiectasis | | 8 (5.8%) | | 5 (7.8%) | | 2 (6.3%) | | 1 (2.3%) | | 0.5 | |
| The data are displayed as median (IQR) or n (%); N is the total number of participants with available information. *1* Kruskal-Wallis rank sum test; Pearson’s Chi-squared test; Fisher’s exact test.  BMI, body mass index; CKD, chronic kidney disease; COPD, chronic obstructive pulmonary disease; CT, computed tomography; ILD, interstitial lung disease; OSA, obstructive sleep apnea; TB, pulmonary tuberculosis; TI, tobacco index. | | | | | | | | | | |

| Table S2. Respiratory therapy and medical management in study participants | | | | | |
| --- | --- | --- | --- | --- | --- |
| Characteristics | **Overall,**  **N = 139** | **Group** | | | **p-value*1*** |
| **HFNC,**  **N = 64** | **HFNC failure,**  **N = 32** | **Early IMV,**  **N = 43** |
| Initial oxygen therapy | |  |  |  |  |
| Previous dispositive | 80 (58%) | 54 (86%) | 24 (75%) | 2 (4.7%) | <0.001 |
| SNC | 43 (54%) | 33 (61%) | 9 (38%) | 1 (50%) | 0.2 |
| SFM | 11 (14%) | 7 (13%) | 4 (17%) | 0 (0%) |  |
| PRB | 25 (31%) | 14 (26%) | 10 (42%) | 1 (50%) |  |
| NRB | 1 (1.3%) | 0 (0%) | 1 (4.2%) | 0 (0%) |  |
| Flow, L/minute | 5.0 (4.0, 10.0) | 5.0 (4.0, 10.0) | 10.0 (5.0, 15.0) | 12.5 (11.3, 13.8) | 0.006 |
| HFNC therapy | |  |  |  |  |
| Duration, days | 4.0 (2.0, 7.3) | 5.5 (3.0, 8.0) | 2.0 (1.0, 4.0) | NA (NA, NA) | <0.001 |
| Flow, L/minute | 52.5 (40.0, 60.0) | 60.0 (40.0, 60.0) | 50.0 (40.0, 60.0) | NA (NA, NA) | 0.11 |
| FiO2 | 60.0 (50.0, 80.0) | 60.0 (50.0, 81.0) | 60.0 (50.0, 80.0) | NA (NA, NA) | 0.8 |
| IMV therapy |  |  |  |  |  |
| Duration, days | 16.0 (10.0, 21.5) | NA (NA, NA) | 17.0 (10.8, 20.3) | 15.0 (9.0, 23.0) | 0.6 |
| Medical management | | |  |  |  |  |
| Prehospitalary antibiotics | | 67 (48%) | 29 (45%) | 14 (44%) | 0 (0) | 0.5 |
| Antiviral drugs | | 43 (31%) | 23 (36%) | 7 (22%) | 13 (30%) | 0.4 |
| Oseltamivir | | 8 (5.8%) | 2 (3.1%) | 1 (3.1%) | 5 (12%) | 0.2 |
| Lopinavir/ritonavir | | 34 (24%) | 19 (30%) | 7 (22%) | 8 (19%) | 0.4 |
| Remdesivir | | 5 (3.6%) | 2 (3.1%) | 1 (3.1%) | 2 (4.7%) | >0.9 |
| In-hospital antibiotics | | 117 (84%) | 47 (73%) | 30 (94%) | 40 (93%) | 0.006 |
| Steroids | | 111 (80%) | 54 (84%) | 29 (91%) | 28 (65%) | 0.012 |
| Steroid days | | 5.0 (3.5, 9.5) | 5.5 (4.0, 10.0) | 8.0 (5.0, 10.0) | 5.0 (0.0, 7.0) | 0.002 |
| Antifungal | | 21 (15%) | 3 (4.7%) | 9 (28%) | 9 (21%) | 0.002 |
| The data are displayed as median (IQR) or n (%); N is the total number of participants with available information.  *1* Kruskal-Wallis rank sum test; Pearson’s Chi-squared test; Fisher’s exact test.  FiO2, fraction of inspired oxygen administered by HNFC; NRB, non-rebreather mask; PRB, partial rebreather mask; SFM, simple face mask; SNC, simple nasal cannula. | | | | | |

| Table S3. Logistic regression analysis of the factors associated with early IMV in patients with COVID-19 pneumonia. | | | | |
| --- | --- | --- | --- | --- |
| Characteristics | **OR*1*** | **95% CI*1*** | **p-value*1*** | **q-value*2*** |
| Male | 3.86 | 1.69, 9.73 | 0.001 | 0.005 |
| ILD | 0.00 | 0.00, 0.00 | 0.002 | 0.009 |
| SAH | 0.21 | 0.07, 0.54 | <0.001 | 0.004 |
| SpO2 | 0.96 | 0.94, 0.98 | <0.001 | 0.004 |
| RR | 1.09 | 1.04, 1.15 | <0.001 | 0.003 |
| PaO2/FiO2 | 0.99 | 0.98, 1.00 | <0.001 | 0.003 |
| Albumin | 0.12 | 0.05, 0.28 | <0.001 | <0.001 |
| GGT | 1.00 | 1.00, 1.01 | 0.013 | 0.041 |
| Troponin | 1.00 | 1.00, 1.01 | 0.008 | 0.028 |
| SOFA | 1.22 | 1.02, 1.48 | 0.029 | 0.057 |
| SMART-COP | 1.60 | 1.25, 2.13 | <0.001 | 0.002 |
| PSI | 1.02 | 1.01, 1.03 | 0.003 | 0.012 |
| *1* OR = Odds Ratio, CI = Confidence Interval.  *2* False discovery rate correction for multiple testing.  GGT, gamma-glutamyl transferase; ILD, interstitial lung disease; PaO2/FiO2, arterial oxygen partial pressure to inspired oxygen fraction ratio; PSI, Pneumonia Severity Index; RR, respiratory rate, SMART-COP: Systolic blood pressure, Multilobar infiltrates, Albumin level, Respiratory rate, Tachycardia, Confusion, Oxygenation, and arterial pH score; SAH, systemic arterial hypertension; SOFA: Sequential Organ Failure Assessment score; SpO2, saturation of oxygen. | | | | |

| Table S4. Logistic regression analysis of the factors associated with HFNC failure in patients with COVID-19 pneumonia. | | | | |
| --- | --- | --- | --- | --- |
| Characteristics | **OR*1*** | **95% CI*1*** | **p-value*1*** | **q-value*2*** |
| Age | 1.04 | 1.01, 1.08 | 0.006 | 0.072 |
| Previous COT flow | 1.17 | 1.05, 1.32 | 0.002 | 0.072 |
| Urea | 1.02 | 1.01, 1.05 | 0.005 | 0.072 |
| BUN | 1.04 | 1.01, 1.09 | 0.010 | 0.100 |
| Lymphocytes | 0.36 | 0.11, 0.92 | 0.028 | 0.171 |
| Symptoms duration | 0.91 | 0.81, 0.99 | 0.017 | 0.144 |
| PSI | 1.02 | 1.01, 1.04 | 0.004 | 0.072 |
| *1* OR = Odds Ratio, CI = Confidence Interval.  *2* False discovery rate correction for multiple testing.  BUN, blood urea nitrogen; COT, conventional oxygen therapy device; PSI, Pneumonia Severity Index. | | | | |
